# Supplementary material for: Does experience of emotional invalidation in childhood lead to growth -- a qualitative enquiry using Interpretative Phenomenological Analysis
Source: Research Square preprint supplement (doi:10.21203/rs.3.rs-6937533/v1), 2025-09-06
Supplement: Supplementary file 2 [file d3c3b12868ff8ca73adb0cff.pdf]

## INSTRUCTIONS

This questionnaire contains items related to certain psychosocial issues.

Please read them carefully. All the items have a few response alternatives. You may endorse more than one response alternative for an item. There is no right or wrong answer.

We sincerely appreciate your time and willingness to engage with this survey. This study is part of a thesis on Post Traumatic Growth and it seeks to explore the psychological challenges people during their childhood, the ways in which they cope, and the barriers they may encounter during their coping process.

Your participation is **entirely voluntary**. You are free to choose whether to take part in this survey, and you may skip any question or withdraw at any point without any consequences. All responses will remain **confidential** and will be used solely for academic and developmental purposes.

The survey includes a mix of multiple-choice and open-ended questions and should take approximately **5–10 minutes** to complete.

Thank you for considering being a part of this important conversation.

.....

|                                               |                              |
|-----------------------------------------------|------------------------------|
| Name                                          | :                            |
| Age                                           | :                            |
| Sex                                           | :                            |
| Educational Qualification                     | :                            |
| Marital Status                                | :                            |
| Duration of marriage                          | :                            |
| Mother Tongue                                 | :                            |
| Languages Known                               | :                            |
| Religion                                      | :                            |
| Family Type                                   | : Nuclear / Joint / Extended |
| Family Income (per month)                     | :                            |
| Number of Children / Dependent                | :                            |
| Suffering from any physical illness? Yes / No |                              |

If yes (please specify) :  
Residence : Urban / Suburban / Rural  
Number of years living in the present residence :  
Change of place of residence? Yes / No

Do you know of anybody whose parent (father or mother) passed away before they were 12 years of age? Yes / No

If yes, please state your relationship with the person

Are both your parents living? Yes / No

If No, out of them who is living? Mother / Father

If No, what was your age when your parent(s) passed away?

According to you which child is reared up in a better manner?

- a. A child in a single parent family due to divorce or separation
- b. A child in a single parent family due to death of a parent.
- c. No difference in the above-mentioned conditions
- d. Others (please specify)

What do you think are the hazards of a child without a parent?

- a. Lack of love and nurturance
- b. Deficit in nutrition
- c. Improper guidance related to education
- d. Poor emotional and social development of the child.
- e. Insecurity and poor self confidence of the child.
- f. Increased independence and autonomy of the child.
- g. Others (please specify)

What according to your opinion makes a child vulnerable to disciplinary problems?

- a. Parental neglect
- b. Parental overprotection
- c. Absence of a parent
- d. Living in a nuclear family set up
- e. Living in a joint family set up
- f. Others (please specify)

What do you think makes a child vulnerable to abuse (physical/sexual/psychological)?

- a. Parental neglect
- b. Absence of a parent
- c. Both working
- d. Living in a nuclear family set up
- e. Living in a joint family set up
- f. Staying in a specific locality
- g. Absence of elder sibling
- h. Mentally ill / substance use
- i. Economic condition
- j. Others (please specify)

Do you think sex education in childhood is necessary or beneficial? Yes / No

Specify the reason in either case

Have you ever known a person who has been physically or sexually abused in childhood? Yes / No

In case of yes, state your relationship with the person

Have you ever had such an experience? Yes / No  
In case yes, would you like to specify the nature?

Do you think people often leave home against their wish? Yes / No  
Can you think of probable reasons?

- a. Riot
- b. War
- c. Flood
- d. Famine
- e. Drought
- f. Earthquake
- g. Others (please specify)

Do you know of anybody who had to move away from his hometown for a significant reason?  
Yes / No  
If yes, specify your relationship with the person

Can you think of the potential hazards a person faces when he / she must leave their hometown?

- a. Loss of job
- b. Loss of friends
- c. Loss of property and assets
- d. Loss of social identity
- e. Others (please specify)

Have you ever had such an experience of leaving your hometown? Yes / No  
If yes, please specify the reason.

What do a person feel when they meet with dismissiveness or they deny their experiences or feelings

- a. Low Self-esteem
- b. Anger
- c. Not able to express appropriate emotions
- d. Difficulty in building trust
- e. Others (Please Specify)

Have you ever shared your feelings with someone only to be met with dismissive or unsupportive responses? Yes/No

If Yes, if you are comfortable, state your relationship with the person

**Would you be interested in giving an interview to share your tribulations with us?**

Yes / No

I would like to contact you further for the purpose of the study and if you are comfortable, please provide with your contact details (Phone Number/ Email ID) whichever you want

.....
